# Supplementary material for: Targeting Class I Histone Deacetylases in Human Uterine Leiomyosarcoma
Source: MDPI journal article supplement (doi:10.3390/cells11233801), 2022-11-27
Supplement: s1 [file s1]

**Table S1. Tucidinostat drug similarity analysis**

| Rank | 1-cos(alpha) | Perturbation         | Cell.line | Dose   | Time  | Signature.URL                                                                      |  |  |  |  |
|------|--------------|----------------------|-----------|--------|-------|------------------------------------------------------------------------------------|--|--|--|--|
| 1    | 0.3386       | BRD-K11663430        | A375      | 10.0um | 6.0h  | https://maayanlab.cloud/L1000CDS2/meta?sig_id=CPC013_A375_6H:BRD-K11663430:10.0    |  |  |  |  |
| 2    | 0.3713       | BRD-K60297835        | HA1E      | 10.0um | 6.0h  | https://maayanlab.cloud/L1000CDS2/meta?sig_id=CPC019_HA1E_6H:BRD-K60297835:10.0    |  |  |  |  |
| 3    | 0.3733       | PHA-665752           | MCF7      | 10um   | 24h   | https://maayanlab.cloud/L1000CDS2/meta?sig_id=LJP005_MCF7_24H:BRD-K95435023:10     |  |  |  |  |
| 4    | 0.3757       | HDAC6 inhibitor ISOX | PL21      | 10.0um | 6.0h  | https://maayanlab.cloud/L1000CDS2/meta?sig_id=CPC006_PL21_6H:BRD-K69840642:10.0    |  |  |  |  |
| 5    | 0.3855       | BRD-K97534490        | MCF7      | 10.0um | 6.0h  | https://maayanlab.cloud/L1000CDS2/meta?sig_id=CPC009_MCF7_6H:BRD-K97534490:10.0    |  |  |  |  |
| 6    | 0.3953       | BRD-K46373671        | A375      | 10.0um | 6.0h  | https://maayanlab.cloud/L1000CDS2/meta?sig_id=CPC019_A375_6H:BRD-K46373671:10.0    |  |  |  |  |
| 7    | 0.3991       | HDAC6 inhibitor ISOX | MCF7      | 10.0um | 24.0h | https://maayanlab.cloud/L1000CDS2/meta?sig_id=CPC006_MCF7_24H:BRD-K69840642:10.0   |  |  |  |  |
| 8    | 0.4019       | BRD-K87387614        | MCF7      | 10.0um | 24.0h | https://maayanlab.cloud/L1000CDS2/meta?sig_id=CPC019_MCF7_24H:BRD-K87387614:10.0   |  |  |  |  |
| 9    | 0.4083       | QL-X-138             | MCF10A    | 3.33um | 24h   | https://maayanlab.cloud/L1000CDS2/meta?sig_id=LJP006_MCF10A_24H:BRD-K72636697:3.33 |  |  |  |  |
| 10   | 0.409        | mocetinostat         | HA1E      | 1.11um | 24h   | https://maayanlab.cloud/L1000CDS2/meta?sig_id=LJP008_HA1E_24H:BRD-K16485616:1.11   |  |  |  |  |
| 11   | 0.4118       | 480743.cdx           | A673      | 80.0um | 6.0h  | https://maayanlab.cloud/L1000CDS2/meta?sig_id=CPC006_A673_6H:BRD-K53903639:80.0    |  |  |  |  |
| 12   | 0.412        | vorinostat           | SNUC4     | 10.0um | 6.0h  | https://maayanlab.cloud/L1000CDS2/meta?sig_id=CPC006_SNUC4_6H:BRD-K81418486:10.0   |  |  |  |  |
| 13   | 0.4125       | BRD-A25170757        | MCF7      | 10.0um | 24.0h | https://maayanlab.cloud/L1000CDS2/meta?sig_id=CPC010_MCF7_24H:BRD-A25170757:10.0   |  |  |  |  |
| 14   | 0.4146       | WYE-125132           | HME1      | 1.11um | 24h   | https://maayanlab.cloud/L1000CDS2/meta?sig_id=LJP006_HME1_24H:BRD-A45498368:1.11   |  |  |  |  |
| 15   | 0.4146       | BRD-K52522949        | HCC515    | 10.0um | 6.0h  | https://maayanlab.cloud/L1000CDS2/meta?sig_id=CPC020_HCC515_6H:BRD-K52522949:10.0  |  |  |  |  |
| 16   | 0.4158       | entinostat           | HA1E      | 0.37um | 24h   | https://maayanlab.cloud/L1000CDS2/meta?sig_id=LJP008_HA1E_24H:BRD-K77908580:0.37   |  |  |  |  |
| 17   | 0.4165       | BRD-K55116708        | A549      | 10.0um | 24.0h | https://maayanlab.cloud/L1000CDS2/meta?sig_id=CPC019_A549_24H:BRD-K55116708:10.0   |  |  |  |  |
| 18   | 0.4192       | wortmannin           | HA1E      | 10.0um | 6.0h  | https://maayanlab.cloud/L1000CDS2/meta?sig_id=CPC013_HA1E_6H:BRD-A75409952:10.0    |  |  |  |  |
| 19   | 0.4236       | GDC-0980             | MCF10A    | 1.11um | 24h   | https://maayanlab.cloud/L1000CDS2/meta?sig_id=LJP005_MCF10A_24H:BRD-A18328003:1.11 |  |  |  |  |
| 20   | 0.4252       | BI-2536              | A375      | 0.37um | 24h   | https://maayanlab.cloud/L1000CDS2/meta?sig_id=LJP006_A375_24H:BRD-K64890080:0.37   |  |  |  |  |
| 21   | 0.4268       | mocetinostat         | HT29      | 0.37um | 24h   | https://maayanlab.cloud/L1000CDS2/meta?sig_id=LJP008_HT29_24H:BRD-K16485616:0.37   |  |  |  |  |
| 22   | 0.4277       | roclitinostat        | HT29      | 3.33um | 24h   | https://maayanlab.cloud/L1000CDS2/meta?sig_id=LJP008_HT29_24H:BRD-K82928847:3.33   |  |  |  |  |
| 23   | 0.4279       | belinostat           | MCF7      | 1.11um | 24h   | https://maayanlab.cloud/L1000CDS2/meta?sig_id=LJP008_MCF7_24H:BRD-K17743125:1.11   |  |  |  |  |
| 24   | 0.4292       | BRD-K82580504        | PC3       | 10.0um | 24.0h | https://maayanlab.cloud/L1000CDS2/meta?sig_id=CPC009_PC3_24H:BRD-K82580504:10.0    |  |  |  |  |
| 25   | 0.4305       | BRD-K77908580        | SKB       | 10.0um | 24.0h | https://maayanlab.cloud/L1000CDS2/meta?sig_id=CPC013_SKB_24H:BRD-K77908580:10.0    |  |  |  |  |
| 26   | 0.4306       | vorinostat           | LOVO      | 11.1um | 6.0h  | https://maayanlab.cloud/L1000CDS2/meta?sig_id=CPC006_LOVO_6H:BRD-K81418486:11.1    |  |  |  |  |
| 27   | 0.4344       | NGC00181736-02       | HA1E      | 10.0um | 6.0h  | https://maayanlab.cloud/L1000CDS2/meta?sig_id=CPC007_HA1E_6H:BRD-K22210218:10.0    |  |  |  |  |
| 28   | 0.4364       | GDC-0980             | MCF10A    | 10um   | 24h   | https://maayanlab.cloud/L1000CDS2/meta?sig_id=LJP005_MCF10A_24H:BRD-A18328003:10   |  |  |  |  |
| 29   | 0.4372       | NU-7441              | MCF7      | 10um   | 24h   | https://maayanlab.cloud/L1000CDS2/meta?sig_id=LJP005_MCF7_24H:BRD-K00337317:10     |  |  |  |  |
| 30   | 0.4378       | GDC-0980             | MCF10A    | 3.33um | 24h   | https://maayanlab.cloud/L1000CDS2/meta?sig_id=LJP005_MCF10A_24H:BRD-A18328003:3.33 |  |  |  |  |
| 31   | 0.4385       | WZ-3105              | HT29      | 0.37um | 24h   | https://maayanlab.cloud/L1000CDS2/meta?sig_id=LJP005_HT29_24H:BRD-K92571446:0.37   |  |  |  |  |
| 32   | 0.4388       | PI-103               | H5578T    | 1.11um | 24h   | https://maayanlab.cloud/L1000CDS2/meta?sig_id=LJP006_H5578T_24H:BRD-K67868012:1.11 |  |  |  |  |
| 33   | 0.4391       | 480743.cdx           | WSUDLCL2  | 80.0um | 6.0h  | https://maayanlab.cloud/L1000CDS2/meta?sig_id=CPC006_WSUDLCL2_6H:BRD-K53903639:80  |  |  |  |  |
| 34   | 0.4411       | AG 494               | PC3       | 10.0um | 24.0h | https://maayanlab.cloud/L1000CDS2/meta?sig_id=CPC001_PC3_24H:BRD-K81209512:10.0    |  |  |  |  |
| 35   | 0.4422       | HY-10228             | VCAP      | 10.0um | 24.0h | https://maayanlab.cloud/L1000CDS2/meta?sig_id=CPC014_VCAP_24H:BRD-K99616396:10.0   |  |  |  |  |
| 36   | 0.4423       | WYE-125132           | MCF10A    | 3.33um | 24h   | https://maayanlab.cloud/L1000CDS2/meta?sig_id=LJP006_MCF10A_24H:BRD-A45498368:3.33 |  |  |  |  |
| 37   | 0.4432       | HG-14-10-04          | HT29      | 1.11um | 24h   | https://maayanlab.cloud/L1000CDS2/meta?sig_id=LJP007_HT29_24H:BRD-K20526256:1.11   |  |  |  |  |
| 38   | 0.4434       | XMD16-144            | MCF7      | 1.11um | 24h   | https://maayanlab.cloud/L1000CDS2/meta?sig_id=LJP005_MCF7_24H:BRD-U64521890:1.11   |  |  |  |  |
| 39   | 0.4437       | Calcipotriol         | PC3       | 10.0um | 24.0h | https://maayanlab.cloud/L1000CDS2/meta?sig_id=CPC005_PC3_24H:BRD-K56429665:10.0    |  |  |  |  |
| 40   | 0.4444       | H7270                | PC3       | 10.0um | 6.0h  | https://maayanlab.cloud/L1000CDS2/meta?sig_id=CPC014_PC3_6H:BRD-A39646320:10.0     |  |  |  |  |
| 41   | 0.4452       | mocetinostat         | A375      | 0.37um | 24h   | https://maayanlab.cloud/L1000CDS2/meta?sig_id=LJP008_A375_24H:BRD-K16485616:0.37   |  |  |  |  |
| 42   | 0.4455       | vorinostat           | HA1E      | 10.0um | 6.0h  | https://maayanlab.cloud/L1000CDS2/meta?sig_id=CPC019_HA1E_6H:BRD-K81418486:10.0    |  |  |  |  |
| 43   | 0.4488       | belinostat           | HA1E      | 0.37um | 24h   | https://maayanlab.cloud/L1000CDS2/meta?sig_id=LJP008_HA1E_24H:BRD-K17743125:0.37   |  |  |  |  |
| 44   | 0.4503       | AT-7519              | HT29      | 1.11um | 24h   | https://maayanlab.cloud/L1000CDS2/meta?sig_id=LJP006_HT29_24H:BRD-K13390322:1.11   |  |  |  |  |
| 45   | 0.4505       | linifanib            | MCF7      | 10um   | 24h   | https://maayanlab.cloud/L1000CDS2/meta?sig_id=LJP006_MCF7_24H:BRD-K99749624:10     |  |  |  |  |
| 46   | 0.4509       | BRD-K06593056        | MCF7      | 10.0um | 6.0h  | https://maayanlab.cloud/L1000CDS2/meta?sig_id=CPC015_MCF7_6H:BRD-K06593056:10.0    |  |  |  |  |
| 47   | 0.4515       | BRD-K14200658        | MCF7      | 10.0um | 6.0h  | https://maayanlab.cloud/L1000CDS2/meta?sig_id=CPC017_MCF7_6H:BRD-K14200658:10.0    |  |  |  |  |
| 48   | 0.4526       | withaferin-a         | MCF10A    | 1.11um | 24h   | https://maayanlab.cloud/L1000CDS2/meta?sig_id=LJP005_MCF10A_24H:BRD-K88378636:1.11 |  |  |  |  |
| 49   | 0.4528       | BRD-K34092011        | MCF7      | 10.0um | 24.0h | https://maayanlab.cloud/L1000CDS2/meta?sig_id=CPC019_MCF7_24H:BRD-K34092011:10.0   |  |  |  |  |
| 50   | 0.4534       | BI-2536              | MCF10A    | 3.33um | 24h   | https://maayanlab.cloud/L1000CDS2/meta?sig_id=LJP006_MCF10A_24H:BRD-K64890080:3.33 |  |  |  |  |

Table S2. DL-sulforaphane drug similarity analysis

| Rank | X1.cos.Î± | Perturbation                          | Cell.line | Dose     | Time  | Signature.URL                                                                            |  |  |  |  |  |  |
|------|-----------|---------------------------------------|-----------|----------|-------|------------------------------------------------------------------------------------------|--|--|--|--|--|--|
| 1    | 0.2199    | GSK-461364                            | HCC515    | 3.33um   | 24h   | https://maayanlab.cloud/L1000CDS2/meta?sig_id=LJP008_HCC515_24H:BRD-K92428232:3.33       |  |  |  |  |  |  |
| 2    | 0.2547    | AT-7519                               | MDAMB231  | 0.12um   | 24h   | https://maayanlab.cloud/L1000CDS2/meta?sig_id=LJP006_MDAMB231_24H:BRD-K13390322:0.12     |  |  |  |  |  |  |
| 3    | 0.26      | Ingenol 3, 20-dibenzoate              | SNGM      | 10.0um   | 6.0h  | https://maayanlab.cloud/L1000CDS2/meta?sig_id=CPC006_SNGM_6H:BRD-A52650764:10.0          |  |  |  |  |  |  |
| 4    | 0.2908    | G3420                                 | PHH       | 10.0um   | 24.0h | https://maayanlab.cloud/L1000CDS2/meta?sig_id=CPC014_PHH_24H:BRD-K28178212:10.0          |  |  |  |  |  |  |
| 5    | 0.2926    | BRD-K09638361                         | HT29      | 10.0um   | 6.0h  | https://maayanlab.cloud/L1000CDS2/meta?sig_id=CPC017_HT29_6H:BRD-K09638361:10.0          |  |  |  |  |  |  |
| 6    | 0.2969    | diphenylcyclopropenone                | PC3       | 10.0um   | 24.0h | https://maayanlab.cloud/L1000CDS2/meta?sig_id=CPC011_PC3_24H:BRD-K51730347:10.0          |  |  |  |  |  |  |
| 7    | 0.2992    | BRD-K66792149                         | MDST8     | 11.1um   | 6.0h  | https://maayanlab.cloud/L1000CDS2/meta?sig_id=CPC006_MDST8_6H:BRD-K66792149:11.1         |  |  |  |  |  |  |
| 8    | 0.3014    | QL-XII-47                             | BT20      | 0.12um   | 24h   | https://maayanlab.cloud/L1000CDS2/meta?sig_id=LJP006_BT20_24H:BRD-K99252563:0.12         |  |  |  |  |  |  |
| 9    | 0.3062    | BRD-K96433222                         | VCAP      | 10.0um   | 6.0h  | https://maayanlab.cloud/L1000CDS2/meta?sig_id=CPC013_VCAP_6H:BRD-K96433222:10.0          |  |  |  |  |  |  |
| 10   | 0.3092    | withaferin-a                          | BT20      | 3.33um   | 24h   | https://maayanlab.cloud/L1000CDS2/meta?sig_id=LJP005_BT20_24H:BRD-K88378636:3.33         |  |  |  |  |  |  |
| 11   | 0.3111    | Rimcazole dihydrochloride             | VCAP      | 10.0um   | 24.0h | https://maayanlab.cloud/L1000CDS2/meta?sig_id=CPC001_VCAP_24H:BRD-A63346720:10.0         |  |  |  |  |  |  |
| 12   | 0.3131    | GW-843682X                            | SKBR3     | 3.33um   | 24h   | https://maayanlab.cloud/L1000CDS2/meta?sig_id=LJP006_SKBR3_24H:BRD-K90382497:3.33        |  |  |  |  |  |  |
| 13   | 0.3146    | QL-XII-47                             | HEPG2     | 1.11um   | 24h   | https://maayanlab.cloud/L1000CDS2/meta?sig_id=LJP006_HEPG2_24H:BRD-K99252563:1.11        |  |  |  |  |  |  |
| 14   | 0.3179    | BTB06091SC                            | PC3       | 10.0um   | 24.0h | https://maayanlab.cloud/L1000CDS2/meta?sig_id=CPC013_PC3_24H:BRD-K82685933:10.0          |  |  |  |  |  |  |
| 15   | 0.3238    | PHA-793887                            | SKBR3     | 0.04um   | 24h   | https://maayanlab.cloud/L1000CDS2/meta?sig_id=LJP006_SKBR3_24H:BRD-K64800655:0.04        |  |  |  |  |  |  |
| 16   | 0.3245    | BRD-K72264770                         | MCF7      | 10.0um   | 6.0h  | https://maayanlab.cloud/L1000CDS2/meta?sig_id=CPC012_MCF7_6H:BRD-K72264770:10.0          |  |  |  |  |  |  |
| 17   | 0.3259    | BMS-345541                            | MDAMB231  | 3.33um   | 24h   | https://maayanlab.cloud/L1000CDS2/meta?sig_id=LJP006_MDAMB231_24H:BRD-K13566078:3.33     |  |  |  |  |  |  |
| 18   | 0.3271    | QL-XII-47                             | HEPG2     | 3.33um   | 24h   | https://maayanlab.cloud/L1000CDS2/meta?sig_id=LJP006_HEPG2_24H:BRD-K99252563:3.33        |  |  |  |  |  |  |
| 19   | 0.3275    | MLS-0390945.0001                      | VCAP      | 10.0um   | 6.0h  | https://maayanlab.cloud/L1000CDS2/meta?sig_id=CPC013_VCAP_6H:BRD-K23027438:10.0          |  |  |  |  |  |  |
| 20   | 0.3301    | HY-10161                              | VCAP      | 10.0um   | 24.0h | https://maayanlab.cloud/L1000CDS2/meta?sig_id=CPC013_VCAP_24H:BRD-K59369769:10.0         |  |  |  |  |  |  |
| 21   | 0.3304    | ON-01910                              | A375      | 10um     | 24h   | https://maayanlab.cloud/L1000CDS2/meta?sig_id=LJP009_A375_24H:BRD-K55187425:10           |  |  |  |  |  |  |
| 22   | 0.3307    | QS 11                                 | NOMO1     | 10.0um   | 6.0h  | https://maayanlab.cloud/L1000CDS2/meta?sig_id=CPC006_NOMO1_6H:BRD-K02526760:10.0         |  |  |  |  |  |  |
| 23   | 0.3308    | RACEPHEDRINE HYDROCHLORIDE            | A549      | 10.0um   | 6.0h  | https://maayanlab.cloud/L1000CDS2/meta?sig_id=CPC005_A549_6H:BRD-A54236247:10.0          |  |  |  |  |  |  |
| 24   | 0.3325    | phorbol-12-myristate-13-acetate (PMA) | HEC108    | 10.0um   | 6.0h  | https://maayanlab.cloud/L1000CDS2/meta?sig_id=CPC006_HEC108_6H:BRD-A15079084:10.0        |  |  |  |  |  |  |
| 25   | 0.3326    | BRD-A10188456                         | HT29      | 10.0um   | 6.0h  | https://maayanlab.cloud/L1000CDS2/meta?sig_id=CPC017_HT29_6H:BRD-A10188456:10.0          |  |  |  |  |  |  |
| 26   | 0.3333    | phorbol-12-myristate-13-acetate (PMA) | SNGM      | 10.0um   | 6.0h  | https://maayanlab.cloud/L1000CDS2/meta?sig_id=CPC006_SNGM_6H:BRD-A15079084:10.0          |  |  |  |  |  |  |
| 27   | 0.3344    | BRD-K87426499                         | A549      | 10.0um   | 6.0h  | https://maayanlab.cloud/L1000CDS2/meta?sig_id=CPC013_A549_6H:BRD-K87426499:10.0          |  |  |  |  |  |  |
| 28   | 0.3375    | BRD-K26818574                         | MCF7      | 10.0um   | 24.0h | https://maayanlab.cloud/L1000CDS2/meta?sig_id=CPC012_MCF7_24H:BRD-K26818574:10.0         |  |  |  |  |  |  |
| 29   | 0.3379    | BRD-K28916077                         | VCAP      | 10.0um   | 6.0h  | https://maayanlab.cloud/L1000CDS2/meta?sig_id=CPC010_VCAP_6H:BRD-K28916077:10.0          |  |  |  |  |  |  |
| 30   | 0.3408    | PNU 74654                             | H1299     | 80.0um   | 6.0h  | https://maayanlab.cloud/L1000CDS2/meta?sig_id=CPC006_H1299_6H:BRD-K30707190:80.0         |  |  |  |  |  |  |
| 31   | 0.341     | fluphenazine                          | VCAP      | 10.0um   | 6.0h  | https://maayanlab.cloud/L1000CDS2/meta?sig_id=CPC005_VCAP_6H:BRD-K55127134:10.0          |  |  |  |  |  |  |
| 32   | 0.3421    | BRD-K36354764                         | MCF7      | 10.0um   | 24.0h | https://maayanlab.cloud/L1000CDS2/meta?sig_id=CPC009_MCF7_24H:BRD-K36354764:10.0         |  |  |  |  |  |  |
| 33   | 0.3425    | BRD-K90382497                         | MCF7      | 10.0um   | 24.0h | https://maayanlab.cloud/L1000CDS2/meta?sig_id=CPC006_MCF7_24H:BRD-K90382497:10.0         |  |  |  |  |  |  |
| 34   | 0.3431    | BRD-K57309821                         | HT29      | 10.0um   | 6.0h  | https://maayanlab.cloud/L1000CDS2/meta?sig_id=CPC019_HT29_6H:BRD-K57309821:10.0          |  |  |  |  |  |  |
| 35   | 0.3448    | LASALOCID SODIUM                      | A375      | 10.0um   | 6.0h  | https://maayanlab.cloud/L1000CDS2/meta?sig_id=CPC005_A375_6H:BRD-A72711497:10.0          |  |  |  |  |  |  |
| 36   | 0.345     |                                       | 2816 HA1E | 10.0um   | 6.0h  | https://maayanlab.cloud/L1000CDS2/meta?sig_id=CPC014_HA1E_6H:BRD-A52193669:10.0          |  |  |  |  |  |  |
| 37   | 0.3474    | BRD-K24132293                         | PHH       | 10.0um   | 24.0h | https://maayanlab.cloud/L1000CDS2/meta?sig_id=CPC017_PHH_24H:BRD-K24132293:10.0          |  |  |  |  |  |  |
| 38   | 0.3485    | BRD-K17140735                         | H1299     | 11.10000 | 6.0h  | https://maayanlab.cloud/L1000CDS2/meta?sig_id=CPC006_H1299_6H:BRD-K17140735:11.100003815 |  |  |  |  |  |  |
| 39   | 0.3496    | NOCODAZOLE                            | MCF7      | 10.0um   | 6.0h  | https://maayanlab.cloud/L1000CDS2/meta?sig_id=CPC004_MCF7_6H:BRD-K12539581:10.0          |  |  |  |  |  |  |
| 40   | 0.3503    | BRD-K71935468                         | VCAP      | 10.0um   | 6.0h  | https://maayanlab.cloud/L1000CDS2/meta?sig_id=CPC012_VCAP_6H:BRD-K71935468:10.0          |  |  |  |  |  |  |
| 41   | 0.3523    | IMD 0354                              | MDST8     | 10.0um   | 6.0h  | https://maayanlab.cloud/L1000CDS2/meta?sig_id=CPC006_MDST8_6H:BRD-K74305673:10.0         |  |  |  |  |  |  |
| 42   | 0.3562    | Ingenol 3, 20-dibenzoate              | MDST8     | 10.0um   | 6.0h  | https://maayanlab.cloud/L1000CDS2/meta?sig_id=CPC006_MDST8_6H:BRD-A52650764:10.0         |  |  |  |  |  |  |
| 43   | 0.3566    | BRD-K28916077                         | HA1E      | 10.0um   | 6.0h  | https://maayanlab.cloud/L1000CDS2/meta?sig_id=CPC010_HA1E_6H:BRD-K28916077:10.0          |  |  |  |  |  |  |
| 44   | 0.357     | BRD-K03816923                         | HEPG2     | 10.0um   | 6.0h  | https://maayanlab.cloud/L1000CDS2/meta?sig_id=CPC018_HEPG2_6H:BRD-K03816923:10.0         |  |  |  |  |  |  |
| 45   | 0.3571    | NP-009265                             | A549      | 10.0um   | 6.0h  | https://maayanlab.cloud/L1000CDS2/meta?sig_id=CPC013_A549_6H:BRD-A57300602:10.0          |  |  |  |  |  |  |
| 46   | 0.3574    | RHODOMYRTOXIN                         | PC3       | 10.0um   | 24.0h | https://maayanlab.cloud/L1000CDS2/meta?sig_id=CPC005_PC3_24H:BRD-K13725475:10.0          |  |  |  |  |  |  |
| 47   | 0.3605    | masitinib                             | A375      | 10um     | 24h   | https://maayanlab.cloud/L1000CDS2/meta?sig_id=LJP007_A375_24H:BRD-K71035033:10           |  |  |  |  |  |  |
| 48   | 0.3605    | NCGC00182362-01                       | MCF7      | 10.0um   | 24.0h | https://maayanlab.cloud/L1000CDS2/meta?sig_id=CPC008_MCF7_24H:BRD-K07259155:10.0         |  |  |  |  |  |  |
| 49   | 0.3607    | BRD-K46373671                         | PC3       | 10.0um   | 6.0h  | https://maayanlab.cloud/L1000CDS2/meta?sig_id=CPC019_PC3_6H:BRD-K46373671:10.0           |  |  |  |  |  |  |
| 50   | 0.3607    | Salermide                             | SNGM      | 120.0um  | 6.0h  | https://maayanlab.cloud/L1000CDS2/meta?sig_id=CPC006_SNGM_6H:BRD-A67788537:120.0         |  |  |  |  |  |  |

**Table S3. Candidate drugs that target the top 10 percent of EMT modules' genes**

| Gene     | Drug                                 | Interaction_types             | Sources                                      | PMIDS                                                                                                       |
|----------|--------------------------------------|-------------------------------|----------------------------------------------|-------------------------------------------------------------------------------------------------------------|
| IL6      | SILTUXIMAB                           | antagonist antibody inhibitor | MyCancerGenome ChemblInteractions TTD        | 8823310                                                                                                     |
| IL6      | ETANERCEPT                           | NA                            | PharmGKB                                     | 24253594                                                                                                    |
| IL6      | IFOSFAMIDE                           | NA                            | NCI                                          | 9260581                                                                                                     |
| IL6      | RIBAVIRIN                            | NA                            | PharmGKB                                     | NA                                                                                                          |
| IL6      | LEVOFLOXACIN                         | NA                            | NCI                                          | 12714806                                                                                                    |
| IL6      | GEMFIBROZIL                          | NA                            | NCI                                          | 8941582                                                                                                     |
| IL6      | NELFINAVIR                           | NA                            | NCI                                          | 15388451                                                                                                    |
| IL6      | SAQUINAVIR                           | NA                            | NCI                                          | 15388451                                                                                                    |
| IL6      | RITUXIMAB                            | NA                            | PharmGKB                                     | 26384320                                                                                                    |
| IL6      | INFLIXIMAB                           | NA                            | PharmGKB                                     | 24253594                                                                                                    |
| IL6      | CISPLATIN                            | NA                            | CIVIC                                        | 21273582                                                                                                    |
| IL6      | FENOFIBRATE                          | NA                            | PharmGKB                                     | 16607077                                                                                                    |
| IL6      | FENTANYL                             | NA                            | NCI                                          | 9527747                                                                                                     |
| IL6      | ADALIMUMAB                           | NA                            | PharmGKB                                     | 24253594                                                                                                    |
| IL6      | INSULIN                              | NA                            | NCI                                          | 17392554                                                                                                    |
| IL6      | LINEZOLID                            | NA                            | NCI                                          | 14561977                                                                                                    |
| IL6      | METRONIDAZOLE                        | NA                            | NCI                                          | 12111578                                                                                                    |
| KCNC1    | DALFAMPRIDINE                        | blocker antagonist            | ChemblInteractions                           | 16472864                                                                                                    |
| KCNC1    | GUANIDINE HYDROCHLORIDE              | blocker                       | ChemblInteractions                           | NA                                                                                                          |
| COL1A1   | OCRIPLASMIN                          | NA                            | ChemblInteractions                           | NA                                                                                                          |
| COL1A1   | COLLAGENASE CLOSTRIDIUM HISTOLYTICUM | NA                            | ChemblInteractions TEND                      | NA                                                                                                          |
| PRKCG    | MIDOSTAURIN                          | inhibitor                     | ChemblInteractions TTD                       | NA                                                                                                          |
| CACNA 1G | TRIMETHADIONE                        | blocker inhibitor             | TdgClinicalTrial ChemblInteractions TEND TTD | 17291698 16171802 11752352 17139284 17016423                                                                |
| CACNA 1G | ZONISAMIDE                           | inhibitor                     | TdgClinicalTrial TEND                        | 19557119 20001433 17762320 19948168 15511691 14965331 17139284 20025128 17016423 20502722 14704463 18433351 |
| CACNA 1G | GABAPENTIN                           | modulator                     | ChemblInteractions                           | NA                                                                                                          |
| CACNA 1G | METHSUXIMIDE                         | inhibitor blocker             | ChemblInteractions TTD                       | 2545161 11274992 19005061 11641441                                                                          |
| CACNA 1G | PARAMETHADIONE                       | blocker                       | ChemblInteractions TTD                       | NA                                                                                                          |
| CACNA 1G | ETHOSUXIMIDE                         | blocker inhibitor             | TdgClinicalTrial ChemblInteractions TEND TTD | 11752352 11274992 19005061 11641441                                                                         |
| CACNA 1G | PREGABALIN                           | modulator                     | ChemblInteractions                           | NA                                                                                                          |
| CACNA 1G | GABAPENTIN ENACARBIL                 | modulator                     | ChemblInteractions                           | NA                                                                                                          |
| CACNA 1G | VERAPAMIL                            | inhibitor                     | TEND TTD                                     | 16699084 21149638 19125880 11752352                                                                         |
| CACNA 1G | PHENSUXIMIDE                         | blocker                       | ChemblInteractions                           | NA                                                                                                          |
| CACNA 1G | BEPRIDIL HYDROCHLORIDE               | blocker                       | ChemblInteractions                           | NA                                                                                                          |
| CACNA 1G | FLUNARIZINE                          | inhibitor                     | TdgClinicalTrial TEND                        | 19582593 11784784 17139284 17016423                                                                         |
| IGF2     | ETOPOSIDE                            | NA                            | NCI                                          | 15019164                                                                                                    |
| IGF2     | GEFITINIB                            | NA                            | NCI                                          | 16988945                                                                                                    |
| IGF2     | CABAZITAXEL                          | NA                            | CIVIC                                        | 25670080                                                                                                    |
| IGF2     | GLUTAMINE                            | NA                            | NCI                                          | 14746834                                                                                                    |
| IGF2     | DOCETAXEL                            | NA                            | CIVIC                                        | 25670080                                                                                                    |
| IGF2     | FLUOXETINE                           | NA                            | NCI                                          | 8265809                                                                                                     |
| IGF2     | GEMCITABINE                          | NA                            | CIVIC                                        | 23741071                                                                                                    |

|            |                                 |           |                           |                                                                |
|------------|---------------------------------|-----------|---------------------------|----------------------------------------------------------------|
| IGF2       | ANASTROZOLE                     | NA        | NCI                       | 11983488                                                       |
| IGF2       | BETAMETHASONE                   | NA        | NCI                       | 10495414                                                       |
| ATP1A3     | DESLANOSIDE                     | inhibitor | ChEMBLInteractions        | NA                                                             |
| ATP1A3     | DIGITOXIN                       | inhibitor | ChEMBLInteractions        | NA                                                             |
| ATP1A3     | DIGOXIN                         | inhibitor | ChEMBLInteractions        | NA                                                             |
| ATP1A3     | ACETYLDIGITOXIN                 | inhibitor | ChEMBLInteractions        | NA                                                             |
| SCN4B      | ZONISAMIDE                      | inhibitor | TdgClinicalTrial          | 19557119 20001433 19948168 15511691 20025128 14704463 18433351 |
| MMP2       | CYCLOSPORINE                    | NA        | NCI                       | 12639820                                                       |
| MMP2       | PRAVASTATIN                     | NA        | NCI                       | 15842807                                                       |
| MMP2       | BEVACIZUMAB                     | NA        | CIVIC                     | 26921265                                                       |
| MMP2       | VINBLASTINE                     | NA        | NCI                       | 10590059                                                       |
| MMP2       | FILGRASTIM                      | NA        | NCI                       | 11391619                                                       |
| MMP2       | ZILEUTON                        | NA        | DTC                       | 24074025                                                       |
| MMP2       | PACLITAXEL                      | NA        | NCI                       | 9174131                                                        |
| MMP2       | SIMVASTATIN                     | NA        | NCI                       | 16436088                                                       |
| MMP2       | LETROZOLE                       | NA        | NCI                       | 12569569                                                       |
| MMP2       | STREPTOZOCIN                    | NA        | NCI                       | 9394952                                                        |
| MMP2       | ACETAZOLAMIDE                   | NA        | DTC                       | 24074025                                                       |
| MMP2       | DEFEROXAMINE                    | NA        | DTC                       | 24074025                                                       |
| MMP2       | RAMIPRIL                        | NA        | NCI                       | 16166267                                                       |
| SLC6A1     | COCAINE                         | NA        | TEND                      | NA                                                             |
| SLC6A1     | TIAGABINE                       | inhibitor | TdgClinicalTrial TEND TTD | 16420077 16377242 20512624 17069932 11752352 18007567          |
| SLC6A1     | TIAGABINE<br>HYDROCHLORIDE      | inhibitor | ChEMBLInteractions        | NA                                                             |
| CACNG<br>7 | BEPRIDIL<br>HYDROCHLORIDE       | blocker   | ChEMBLInteractions        | NA                                                             |
| CACNG<br>7 | PREGABALIN                      | modulator | ChEMBLInteractions        | NA                                                             |
| CACNG<br>7 | GABAPENTIN                      | modulator | ChEMBLInteractions        | NA                                                             |
| CACNG<br>7 | GABAPENTIN<br>ENACARBIL         | modulator | ChEMBLInteractions        | NA                                                             |
| SCN4A      | LEVOPRIVACAINE<br>HYDROCHLORIDE | blocker   | ChEMBLInteractions        | NA                                                             |
| SCN4A      | RILUZOLE                        | blocker   | ChEMBLInteractions        | NA                                                             |
| SCN4A      | PROPARGACAINE<br>HYDROCHLORIDE  | blocker   | ChEMBLInteractions        | NA                                                             |
| SCN4A      | PROCAINE<br>HYDROCHLORIDE       | blocker   | ChEMBLInteractions        | NA                                                             |
| SCN4A      | CARBAMAZEPINE                   | blocker   | ChEMBLInteractions        | NA                                                             |
| SCN4A      | LIDOCAINE<br>HYDROCHLORIDE      | blocker   | ChEMBLInteractions        | NA                                                             |
| SCN4A      | BUPIVACAINE<br>HYDROCHLORIDE    | blocker   | ChEMBLInteractions        | NA                                                             |
| SCN4A      | QUINIDINE SULFATE               | blocker   | ChEMBLInteractions        | NA                                                             |
| SCN4A      | DRONEDARONE<br>HYDROCHLORIDE    | blocker   | ChEMBLInteractions        | NA                                                             |
| SCN4A      | ORPHENADRINE<br>CITRATE         | blocker   | ChEMBLInteractions        | NA                                                             |
| SCN4A      | FOSPHENYTOIN<br>SODIUM          | blocker   | ChEMBLInteractions        | NA                                                             |
| SCN4A      | PHENACEMIDE                     | blocker   | ChEMBLInteractions        | NA                                                             |
| SCN4A      | RANOLAZINE                      | blocker   | ChEMBLInteractions        | NA                                                             |
| SCN4A      | PROPOFOL                        | inhibitor | TdgClinicalTrial TEND     | 18574460                                                       |
| SCN4A      | ERLOSAMIDE                      | blocker   | ChEMBLInteractions        | NA                                                             |
| SCN4A      | PROPOXYCAINE<br>HYDROCHLORIDE   | blocker   | ChEMBLInteractions        | NA                                                             |

|       |                                  |                   |                                     |                                                                |
|-------|----------------------------------|-------------------|-------------------------------------|----------------------------------------------------------------|
| SCN4A | MEPHENYTOIN                      | blocker           | ChemblInteractions                  | NA                                                             |
| SCN4A | PROCAINAMIDE<br>HYDROCHLORIDE    | blocker           | ChemblInteractions                  | NA                                                             |
| SCN4A | ETIDOCAINE<br>HYDROCHLORIDE      | blocker           | ChemblInteractions                  | NA                                                             |
| SCN4A | PHENYTOIN SODIUM                 | blocker           | ChemblInteractions                  | NA                                                             |
| SCN4A | DYCLONINE<br>HYDROCHLORIDE       | blocker           | ChemblInteractions                  | NA                                                             |
| SCN4A | ESLICARBAZEPINE<br>ACETATE       | blocker           | ChemblInteractions                  | NA                                                             |
| SCN4A | TETRACAINE                       | blocker           | ChemblInteractions                  | NA                                                             |
| SCN4A | INDECAINIDE<br>HYDROCHLORIDE     | blocker           | ChemblInteractions                  | NA                                                             |
| SCN4A | OXCARBAZEPINE                    | blocker           | ChemblInteractions                  | NA                                                             |
| SCN4A | PHENYTOIN                        | blocker           | ChemblInteractions                  | NA                                                             |
| SCN4A | MEXILETINE<br>HYDROCHLORIDE      | blocker           | ChemblInteractions                  | NA                                                             |
| SCN4A | BENOXINATE<br>HYDROCHLORIDE      | blocker           | ChemblInteractions                  | NA                                                             |
| SCN4A | QUINIDINE<br>POLYGALACTURONATE   | blocker           | ChemblInteractions                  | NA                                                             |
| SCN4A | BUPIVACAINE                      | blocker           | ChemblInteractions                  | NA                                                             |
| SCN4A | PHENAZOPYRIDINE<br>HYDROCHLORIDE | blocker           | ChemblInteractions                  | NA                                                             |
| SCN4A | RUFINAMIDE                       | blocker           | ChemblInteractions                  | NA                                                             |
| SCN4A | ESLICARBAZEPINE                  | blocker           | ChemblInteractions                  | NA                                                             |
| SCN4A | PRIMIDONE                        | blocker           | ChemblInteractions                  | NA                                                             |
| SCN4A | PRILOCAINE                       | blocker           | ChemblInteractions                  | NA                                                             |
| SCN4A | QUINIDINE<br>GLUCONATE           | blocker           | ChemblInteractions                  | NA                                                             |
| SCN4A | ETHOTOIN                         | blocker           | ChemblInteractions                  | NA                                                             |
| SCN4A | SAFINAMIDE                       | NA                | TdgClinicalTrial                    | NA                                                             |
| SCN4A | MEPIVACAINE<br>HYDROCHLORIDE     | blocker           | ChemblInteractions                  | NA                                                             |
| SCN4A | ROPIVACAINE<br>HYDROCHLORIDE     | blocker           | ChemblInteractions                  | NA                                                             |
| SCN4A | TOPIRAMATE                       | blocker           | ChemblInteractions                  | NA                                                             |
| SCN4A | CHLOROPROCAINE<br>HYDROCHLORIDE  | blocker           | ChemblInteractions                  | NA                                                             |
| SCN4A | ZONISAMIDE                       | inhibitor blocker | TdgClinicalTrial ChemblInteractions | 19557119 20001433 19948168 15511691 20025128 14704463 18433351 |
| SCN4A | DISOPYRAMIDE<br>PHOSPHATE        | blocker           | ChemblInteractions                  | NA                                                             |
| SCN4A | PRILOCAINE<br>HYDROCHLORIDE      | blocker           | ChemblInteractions                  | NA                                                             |
| SCN4A | ORPHENADRINE<br>HYDROCHLORIDE    | blocker           | ChemblInteractions                  | NA                                                             |
| SCN4A | MORICIZINE<br>HYDROCHLORIDE      | blocker           | ChemblInteractions                  | NA                                                             |
| SCN4A | LIDOCAINE                        | blocker           | ChemblInteractions                  | 14662728                                                       |
| SCN4A | HEXYLCAINE<br>HYDROCHLORIDE      | blocker           | ChemblInteractions                  | NA                                                             |
| SCN4A | PROPAFENONE<br>HYDROCHLORIDE     | blocker           | ChemblInteractions                  | NA                                                             |
| SCN4A | FOSPROPOFOL                      | NA                | TEND                                | NA                                                             |
| SCN4A | LAMOTRIGINE                      | blocker           | ChemblInteractions                  | NA                                                             |
| SCN4A | TOCAINIDE<br>HYDROCHLORIDE       | blocker           | ChemblInteractions                  | NA                                                             |
| SCN4A | ARTICAINE<br>HYDROCHLORIDE       | blocker           | ChemblInteractions                  | NA                                                             |
| SCN4A | MERETHOXYLLINE<br>PROCAINE       | blocker           | ChemblInteractions                  | NA                                                             |
| SCN4A | TETRACAINE<br>HYDROCHLORIDE      | blocker           | ChemblInteractions                  | NA                                                             |
| CXCL8 | VERAPAMIL                        | NA                | NCI                                 | 2686646                                                        |
| CXCL8 | TRETINOIN                        | NA                | NCI                                 | 8900181                                                        |
| CXCL8 | ASPIRIN                          | NA                | NCI                                 | 12576442                                                       |

|        |                                      |                    |                                                |                            |
|--------|--------------------------------------|--------------------|------------------------------------------------|----------------------------|
| CXCL8  | ACETAMINOPHEN                        | NA                 | NCI                                            | 15878691                   |
| CXCL8  | CLARITHROMYCIN                       | NA                 | NCI                                            | 12003967                   |
| CXCL8  | PYROGALLOL                           | NA                 | DTC                                            | NA                         |
| CXCL8  | TALC                                 | NA                 | NCI                                            | 17000556                   |
| CXCL8  | RETINOL                              | NA                 | DTC                                            | NA                         |
| CXCL8  | HYDROQUINONE                         | NA                 | DTC NCI                                        | 17118622                   |
| CXCL8  | METHIMAZOLE                          | NA                 | NCI                                            | 11453524                   |
| CXCL8  | CEFTRIAXONE                          | NA                 | NCI                                            | 8011012                    |
| CXCL8  | DANAZOL                              | NA                 | NCI                                            | 16161451                   |
| CXCL8  | DACARBAZINE                          | NA                 | DTC                                            | NA                         |
| CXCL8  | RIBAVIRIN                            | NA                 | DTC                                            | NA                         |
| CXCL8  | ALPRAZOLAM                           | NA                 | NCI                                            | 12218154                   |
| CXCL8  | CIDOFOVIR                            | NA                 | NCI                                            | 10630964                   |
| CXCL8  | IBUPROFEN                            | NA                 | TTD                                            | NA                         |
| CXCL8  | PENTOXIFYLLINE                       | NA                 | NCI                                            | 12576442                   |
| CXCL8  | BEVACIZUMAB                          | NA                 | PharmGKB                                       | 23584701                   |
| CXCL8  | DIPYRIDAMOLE                         | NA                 | NCI                                            | 10660968                   |
| CXCL8  | SUNITINIB                            | NA                 | PharmGKB                                       | 26387812                   |
| CXCL8  | CETUXIMAB                            | NA                 | NCI                                            | 10614716 15908664 10037173 |
| CXCL8  | LEFLUNOMIDE                          | NA                 | NCI                                            | 10902750                   |
| CXCL8  | OMEPRAZOLE                           | NA                 | NCI                                            | 17122965                   |
| CXCL8  | PAMIDRONIC ACID                      | NA                 | NCI                                            | 12006522                   |
| CXCL8  | NAPROXEN                             | NA                 | NCI                                            | 11852880                   |
| CXCL8  | FENTANYL                             | NA                 | NCI                                            | 9527747                    |
| CXCL8  | FOSCARNET                            | NA                 | NCI                                            | 10630964                   |
| CXCL8  | LANSOPRAZOLE                         | NA                 | NCI                                            | 17122965                   |
| CXCL8  | COLCHICINE                           | NA                 | DTC                                            | NA                         |
| CXCL8  | PACLITAXEL                           | NA                 | NCI                                            | 9271387                    |
| CXCL8  | MIDAZOLAM                            | NA                 | NCI                                            | 9620522                    |
| COL5A1 | OCRIPLASMIN                          | NA                 | ChEMBLinteractions                             | NA                         |
| COL5A1 | COLLAGENASE CLOSTRIDIUM HISTOLYTICUM | NA                 | ChEMBLinteractions                             | NA                         |
| KCNB1  | GUANIDINE HYDROCHLORIDE              | blocker            | ChEMBLinteractions                             | NA                         |
| KCNB1  | DALFAMPRIDINE                        | antagonist blocker | ChEMBLinteractions                             | 16472864                   |
| KCNJ2  | DRONEDARONE HYDROCHLORIDE            | blocker            | ChEMBLinteractions                             | NA                         |
| ERBB3  | OSIMERTINIB MESYLATE                 | inhibitor          | ChEMBLinteractions                             | NA                         |
| ERBB3  | CARBOPLATIN                          | NA                 | PharmGKB                                       | 30071039                   |
| ERBB3  | TRASTUZUMAB                          | NA                 | DoCM CIVIC PharmGKB                            | 23680147 25953157 30071039 |
| ERBB3  | ERLOTINIB                            | NA                 | PharmGKB                                       | NA                         |
| ERBB3  | DACOMITINIB                          | inhibitor          | ChEMBLinteractions MyCancerGenomeClinicalTrial | NA                         |
| ERBB3  | PERTUZUMAB                           | NA                 | DoCM CIVIC                                     | 23680147 26206558 25216528 |
| ERBB3  | DOCETAXEL                            | NA                 | PharmGKB                                       | 30071039                   |
| ERBB3  | VANDETANIB                           | inhibitor          | ChEMBLinteractions                             | NA                         |
| ERBB3  | CETUXIMAB                            | NA                 | CIViC                                          | 25520391                   |

|       |                                      |           |                                            |                            |
|-------|--------------------------------------|-----------|--------------------------------------------|----------------------------|
| ERBB3 | AFATINIB                             | NA        | CIVIC                                      | 27044931 24685132          |
| ERBB3 | GEFITINIB                            | inhibitor | CIVIC MyCancerGenomeClinicalTrial PharmGKB | 24685132                   |
| ERBB3 | LAPATINIB                            | NA        | DoCM CIVIC PharmGKB                        | 23680147 25953157 25398453 |
| ERBB3 | TRAMETINIB                           | NA        | CIVIC                                      | 25952648                   |
| MMP1  | RIBAVIRIN                            | NA        | NCI                                        | 16699498                   |
| MMP1  | COLLAGENASE CLOSTRIDIUM HISTOLYTICUM | NA        | TdgClinicalTrial                           | NA                         |
| MMP1  | MEDROXYPROGESTERONE ACETATE          | NA        | NCI                                        | 9436888                    |
| MMP1  | LAMIVUDINE                           | NA        | NCI                                        | 15309715                   |
| MMP1  | PENTOSAN POLYSULFATE SODIUM          | NA        | NCI                                        | 1384503                    |
| MMP1  | LEFLUNOMIDE                          | NA        | NCI                                        | 16762150                   |
| MMP1  | TRIAMCINOLONE                        | NA        | NCI                                        | 12123742                   |
| MMP1  | DOXYCYCLINE CALCIUM                  | inhibitor | ChemblInteractions                         | NA                         |
| MMP1  | DOXYCYCLINE                          | inhibitor | ChemblInteractions                         | NA                         |
| MMP1  | SIROLIMUS                            | NA        | NCI                                        | 16914544                   |
| MMP1  | LEUPROLIDE ACETATE                   | NA        | NCI                                        | 9433928                    |
| MMP1  | HYDROCORTISONE                       | NA        | NCI                                        | 7592884                    |

**Table S4. Drug candidates for EMT inhibition**

| Rank | 1-cos(Alpha) | Perturbation                        | Perturbation.LIFE.URL                                                                                                                                                                                               | Perturbation.PubChem.URL                                                                                                                        | Perturbation.DrugBank.URL                                                               | Cell line | Dose   | Time  |
|------|--------------|-------------------------------------|---------------------------------------------------------------------------------------------------------------------------------------------------------------------------------------------------------------------|-------------------------------------------------------------------------------------------------------------------------------------------------|-----------------------------------------------------------------------------------------|-----------|--------|-------|
| 1    | 1.5159       | CX-5461                             | <a href="http://life.ccs.miami.edu/life/summary?mode=SmallMolecule&amp;source=BROAD&amp;input=BRD-K12787259">http://life.ccs.miami.edu/life/summary?mode=SmallMolecule&amp;source=BROAD&amp;input=BRD-K12787259</a> | None                                                                                                                                            | None                                                                                    | PC3       | 0.37uM | 24h   |
| 2    | 1.4859       | BRD-K96799727                       | <a href="http://life.ccs.miami.edu/life/summary?mode=SmallMolecule&amp;source=BROAD&amp;input=BRD-K96799727">http://life.ccs.miami.edu/life/summary?mode=SmallMolecule&amp;source=BROAD&amp;input=BRD-K96799727</a> | <a href="http://pubchem.ncbi.nlm.nih.gov/summary/summary.cgi?cid=327653">http://pubchem.ncbi.nlm.nih.gov/summary/summary.cgi?cid=327653</a>     | None                                                                                    | HEC108    | 10.0uM | 6.0h  |
| 3    | 1.4721       | PD-0325901                          | <a href="http://life.ccs.miami.edu/life/summary?mode=SmallMolecule&amp;source=BROAD&amp;input=BRD-K49865102">http://life.ccs.miami.edu/life/summary?mode=SmallMolecule&amp;source=BROAD&amp;input=BRD-K49865102</a> | <a href="http://pubchem.ncbi.nlm.nih.gov/summary/summary.cgi?cid=9826528">http://pubchem.ncbi.nlm.nih.gov/summary/summary.cgi?cid=9826528</a>   | None                                                                                    | MCF7      | 1.11uM | 3h    |
| 4    | 1.4486       | VEGF Receptor 2 Kinase Inhibitor IV | <a href="http://life.ccs.miami.edu/life/summary?mode=SmallMolecule&amp;source=BROAD&amp;input=BRD-K61737877">http://life.ccs.miami.edu/life/summary?mode=SmallMolecule&amp;source=BROAD&amp;input=BRD-K61737877</a> | <a href="http://pubchem.ncbi.nlm.nih.gov/summary/summary.cgi?cid=5329468">http://pubchem.ncbi.nlm.nih.gov/summary/summary.cgi?cid=5329468</a>   | None                                                                                    | VCAP      | 10.0uM | 24.0h |
| 5    | 1.4398       | motesanib                           | <a href="http://life.ccs.miami.edu/life/summary?mode=SmallMolecule&amp;source=BROAD&amp;input=BRD-K99616396">http://life.ccs.miami.edu/life/summary?mode=SmallMolecule&amp;source=BROAD&amp;input=BRD-K99616396</a> | <a href="http://pubchem.ncbi.nlm.nih.gov/summary/summary.cgi?cid=11667893">http://pubchem.ncbi.nlm.nih.gov/summary/summary.cgi?cid=11667893</a> | None                                                                                    | MCF7      | 10uM   | 24h   |
| 6    | 1.4396       | BRD-K08448573                       | <a href="http://life.ccs.miami.edu/life/summary?mode=SmallMolecule&amp;source=BROAD&amp;input=BRD-K08448573">http://life.ccs.miami.edu/life/summary?mode=SmallMolecule&amp;source=BROAD&amp;input=BRD-K08448573</a> | <a href="http://pubchem.ncbi.nlm.nih.gov/summary/summary.cgi?cid=44511133">http://pubchem.ncbi.nlm.nih.gov/summary/summary.cgi?cid=44511133</a> | None                                                                                    | HEPG2     | 10.0uM | 6.0h  |
| 7    | 1.4285       | BW-B 70C                            | <a href="http://life.ccs.miami.edu/life/summary?mode=SmallMolecule&amp;source=BROAD&amp;input=BRD-A68891053">http://life.ccs.miami.edu/life/summary?mode=SmallMolecule&amp;source=BROAD&amp;input=BRD-A68891053</a> | <a href="http://pubchem.ncbi.nlm.nih.gov/summary/summary.cgi?cid=5353454">http://pubchem.ncbi.nlm.nih.gov/summary/summary.cgi?cid=5353454</a>   | None                                                                                    | VCAP      | 10.0uM | 24.0h |
| 8    | 1.4235       | Ch 55                               | <a href="http://life.ccs.miami.edu/life/summary?mode=SmallMolecule&amp;source=BROAD&amp;input=BRD-K51290057">http://life.ccs.miami.edu/life/summary?mode=SmallMolecule&amp;source=BROAD&amp;input=BRD-K51290057</a> | <a href="http://pubchem.ncbi.nlm.nih.gov/summary/summary.cgi?cid=6184667">http://pubchem.ncbi.nlm.nih.gov/summary/summary.cgi?cid=6184667</a>   | None                                                                                    | HT29      | 10.0uM | 6.0h  |
| 9    | 1.4233       | NOCODAZOLE                          | <a href="http://life.ccs.miami.edu/life/summary?mode=SmallMolecule&amp;source=BROAD&amp;input=BRD-K12539581">http://life.ccs.miami.edu/life/summary?mode=SmallMolecule&amp;source=BROAD&amp;input=BRD-K12539581</a> | <a href="http://pubchem.ncbi.nlm.nih.gov/summary/summary.cgi?cid=4122">http://pubchem.ncbi.nlm.nih.gov/summary/summary.cgi?cid=4122</a>         | None                                                                                    | HT29      | 10.0uM | 6.0h  |
| 10   | 1.4209       | SB 225002                           | <a href="http://life.ccs.miami.edu/life/summary?mode=SmallMolecule&amp;source=BROAD&amp;input=BRD-K61323504">http://life.ccs.miami.edu/life/summary?mode=SmallMolecule&amp;source=BROAD&amp;input=BRD-K61323504</a> | <a href="http://pubchem.ncbi.nlm.nih.gov/summary/summary.cgi?cid=3854666">http://pubchem.ncbi.nlm.nih.gov/summary/summary.cgi?cid=3854666</a>   | None                                                                                    | VCAP      | 10.0uM | 24.0h |
| 11   | 1.4203       | BRD-K67860401                       | <a href="http://life.ccs.miami.edu/life/summary?mode=SmallMolecule&amp;source=BROAD&amp;input=BRD-K67860401">http://life.ccs.miami.edu/life/summary?mode=SmallMolecule&amp;source=BROAD&amp;input=BRD-K67860401</a> | <a href="http://pubchem.ncbi.nlm.nih.gov/summary/summary.cgi?cid=448014">http://pubchem.ncbi.nlm.nih.gov/summary/summary.cgi?cid=448014</a>     | None                                                                                    | A549      | 10.0uM | 24.0h |
| 12   | 1.4178       | Phensuximide                        | <a href="http://life.ccs.miami.edu/life/summary?mode=SmallMolecule&amp;source=BROAD&amp;input=BRD-A18043272">http://life.ccs.miami.edu/life/summary?mode=SmallMolecule&amp;source=BROAD&amp;input=BRD-A18043272</a> | <a href="http://pubchem.ncbi.nlm.nih.gov/summary/summary.cgi?cid=6839">http://pubchem.ncbi.nlm.nih.gov/summary/summary.cgi?cid=6839</a>         | <a href="http://www.drugbank.ca/drugs/DB00832">http://www.drugbank.ca/drugs/DB00832</a> | MCF7      | 10.0uM | 6.0h  |
| 13   | 1.41         | MLN4924                             | <a href="http://life.ccs.miami.edu/life/summary?mode=SmallMolecule&amp;source=BROAD&amp;input=BRD-K67844266">http://life.ccs.miami.edu/life/summary?mode=SmallMolecule&amp;source=BROAD&amp;input=BRD-K67844266</a> | <a href="http://pubchem.ncbi.nlm.nih.gov/summary/summary.cgi?cid=16720766">http://pubchem.ncbi.nlm.nih.gov/summary/summary.cgi?cid=16720766</a> | None                                                                                    | HEPG2     | 11.1uM | 6.0h  |

|    |            |                                      |                                                                                                                                                                                                                     |                                                                                                                                                 |      |                  |                |               |
|----|------------|--------------------------------------|---------------------------------------------------------------------------------------------------------------------------------------------------------------------------------------------------------------------|-------------------------------------------------------------------------------------------------------------------------------------------------|------|------------------|----------------|---------------|
| 14 | 1.40<br>67 | MLS-0106435.0004                     | <a href="http://life.ccs.miami.edu/life/summary?mode=SmallMolecule&amp;source=BROAD&amp;input=BRD-K67118123">http://life.ccs.miami.edu/life/summary?mode=SmallMolecule&amp;source=BROAD&amp;input=BRD-K67118123</a> | <a href="http://pubchem.ncbi.nlm.nih.gov/summary/summary.cgi?cid=25199560">http://pubchem.ncbi.nlm.nih.gov/summary/summary.cgi?cid=25199560</a> | None | VCAP             | 10.<br>0u<br>m | 24<br>.0<br>h |
| 15 | 1.40<br>63 | Azlocillin sodium salt               | <a href="http://life.ccs.miami.edu/life/summary?mode=SmallMolecule&amp;source=BROAD&amp;input=BRD-K73437736">http://life.ccs.miami.edu/life/summary?mode=SmallMolecule&amp;source=BROAD&amp;input=BRD-K73437736</a> | <a href="http://pubchem.ncbi.nlm.nih.gov/summary/summary.cgi?cid=6560164">http://pubchem.ncbi.nlm.nih.gov/summary/summary.cgi?cid=6560164</a>   | None | PC3              | 10.<br>0u<br>m | 6.<br>0h      |
| 16 | 1.40<br>51 | BRD-K14711204                        | <a href="http://life.ccs.miami.edu/life/summary?mode=SmallMolecule&amp;source=BROAD&amp;input=BRD-K14711204">http://life.ccs.miami.edu/life/summary?mode=SmallMolecule&amp;source=BROAD&amp;input=BRD-K14711204</a> | <a href="http://pubchem.ncbi.nlm.nih.gov/summary/summary.cgi?cid=50904528">http://pubchem.ncbi.nlm.nih.gov/summary/summary.cgi?cid=50904528</a> | None | HT29             | 10.<br>0u<br>m | 6.<br>0h      |
| 17 | 1.40<br>39 | BRD-K18163752                        | <a href="http://life.ccs.miami.edu/life/summary?mode=SmallMolecule&amp;source=BROAD&amp;input=BRD-K18163752">http://life.ccs.miami.edu/life/summary?mode=SmallMolecule&amp;source=BROAD&amp;input=BRD-K18163752</a> | <a href="http://pubchem.ncbi.nlm.nih.gov/summary/summary.cgi?cid=24030598">http://pubchem.ncbi.nlm.nih.gov/summary/summary.cgi?cid=24030598</a> | None | HEPG<br>2        | 10.<br>0u<br>m | 6.<br>0h      |
| 18 | 1.40<br>12 | Emetine Dihydrochloride Hydrate (74) | <a href="http://life.ccs.miami.edu/life/summary?mode=SmallMolecule&amp;source=BROAD&amp;input=BRD-K01976263">http://life.ccs.miami.edu/life/summary?mode=SmallMolecule&amp;source=BROAD&amp;input=BRD-K01976263</a> | <a href="http://pubchem.ncbi.nlm.nih.gov/summary/summary.cgi?cid=11957493">http://pubchem.ncbi.nlm.nih.gov/summary/summary.cgi?cid=11957493</a> | None | A375             | 0.6<br>3u<br>m | 6.<br>0h      |
| 19 | 1.40<br>01 | ODQ                                  | <a href="http://life.ccs.miami.edu/life/summary?mode=SmallMolecule&amp;source=BROAD&amp;input=BRD-K26015241">http://life.ccs.miami.edu/life/summary?mode=SmallMolecule&amp;source=BROAD&amp;input=BRD-K26015241</a> | <a href="http://pubchem.ncbi.nlm.nih.gov/summary/summary.cgi?cid=1456">http://pubchem.ncbi.nlm.nih.gov/summary/summary.cgi?cid=1456</a>         | None | VCAP             | 10.<br>0u<br>m | 24<br>.0<br>h |
| 20 | 1.39<br>75 | Xaliproden hydrochloride             | <a href="http://life.ccs.miami.edu/life/summary?mode=SmallMolecule&amp;source=BROAD&amp;input=BRD-K88358234">http://life.ccs.miami.edu/life/summary?mode=SmallMolecule&amp;source=BROAD&amp;input=BRD-K88358234</a> | <a href="http://pubchem.ncbi.nlm.nih.gov/summary/summary.cgi?cid=128919">http://pubchem.ncbi.nlm.nih.gov/summary/summary.cgi?cid=128919</a>     | None | VCAP             | 10.<br>0u<br>m | 6.<br>0h      |
| 21 | 1.39<br>73 | ST4049616                            | <a href="http://life.ccs.miami.edu/life/summary?mode=SmallMolecule&amp;source=BROAD&amp;input=BRD-K18587499">http://life.ccs.miami.edu/life/summary?mode=SmallMolecule&amp;source=BROAD&amp;input=BRD-K18587499</a> | <a href="http://pubchem.ncbi.nlm.nih.gov/summary/summary.cgi?cid=6602526">http://pubchem.ncbi.nlm.nih.gov/summary/summary.cgi?cid=6602526</a>   | None | A549             | 10.<br>0u<br>m | 6.<br>0h      |
| 22 | 1.39<br>71 | BRD-K23657553                        | <a href="http://life.ccs.miami.edu/life/summary?mode=SmallMolecule&amp;source=BROAD&amp;input=BRD-K23657553">http://life.ccs.miami.edu/life/summary?mode=SmallMolecule&amp;source=BROAD&amp;input=BRD-K23657553</a> | <a href="http://pubchem.ncbi.nlm.nih.gov/summary/summary.cgi?cid=44500949">http://pubchem.ncbi.nlm.nih.gov/summary/summary.cgi?cid=44500949</a> | None | A549             | 10.<br>0u<br>m | 6.<br>0h      |
| 23 | 1.39<br>48 | CYCLOHEXIMIDE                        | <a href="http://life.ccs.miami.edu/life/summary?mode=SmallMolecule&amp;source=BROAD&amp;input=BRD-K36055864">http://life.ccs.miami.edu/life/summary?mode=SmallMolecule&amp;source=BROAD&amp;input=BRD-K36055864</a> | <a href="http://pubchem.ncbi.nlm.nih.gov/summary/summary.cgi?cid=6197">http://pubchem.ncbi.nlm.nih.gov/summary/summary.cgi?cid=6197</a>         | None | HT29             | 10.<br>0u<br>m | 6.<br>0h      |
| 24 | 1.39<br>44 | VU0365114-2                          | <a href="http://life.ccs.miami.edu/life/summary?mode=SmallMolecule&amp;source=BROAD&amp;input=BRD-K37456065">http://life.ccs.miami.edu/life/summary?mode=SmallMolecule&amp;source=BROAD&amp;input=BRD-K37456065</a> | <a href="http://pubchem.ncbi.nlm.nih.gov/summary/summary.cgi?cid=45281794">http://pubchem.ncbi.nlm.nih.gov/summary/summary.cgi?cid=45281794</a> | None | HT29             | 10.<br>0u<br>m | 6.<br>0h      |
| 25 | 1.39<br>4  | NCGC00180995-01                      | <a href="http://life.ccs.miami.edu/life/summary?mode=SmallMolecule&amp;source=BROAD&amp;input=BRD-K89563433">http://life.ccs.miami.edu/life/summary?mode=SmallMolecule&amp;source=BROAD&amp;input=BRD-K89563433</a> | <a href="http://pubchem.ncbi.nlm.nih.gov/summary/summary.cgi?cid=44142113">http://pubchem.ncbi.nlm.nih.gov/summary/summary.cgi?cid=44142113</a> | None | VCAP             | 10.<br>0u<br>m | 24<br>.0<br>h |
| 26 | 1.39<br>19 | BRD-K72029282                        | <a href="http://life.ccs.miami.edu/life/summary?mode=SmallMolecule&amp;source=BROAD&amp;input=BRD-K72029282">http://life.ccs.miami.edu/life/summary?mode=SmallMolecule&amp;source=BROAD&amp;input=BRD-K72029282</a> | <a href="http://pubchem.ncbi.nlm.nih.gov/summary/summary.cgi?cid=4912">http://pubchem.ncbi.nlm.nih.gov/summary/summary.cgi?cid=4912</a>         | None | NPC              | 10.<br>0u<br>m | 24<br>.0<br>h |
| 27 | 1.39<br>17 | CHIR-99021                           | <a href="http://life.ccs.miami.edu/life/summary?mode=SmallMolecule&amp;source=BROAD&amp;input=BRD-K16189898">http://life.ccs.miami.edu/life/summary?mode=SmallMolecule&amp;source=BROAD&amp;input=BRD-K16189898</a> | <a href="http://pubchem.ncbi.nlm.nih.gov/summary/summary.cgi?cid=9956119">http://pubchem.ncbi.nlm.nih.gov/summary/summary.cgi?cid=9956119</a>   | None | MDA<br>MB23<br>1 | 3.3<br>3u<br>m | 24<br>h       |
| 28 | 1.39<br>13 | NCGC00238427-01                      | <a href="http://life.ccs.miami.edu/life/summary?mode=SmallMolecule&amp;source=BROAD&amp;input=BRD-A38793261">http://life.ccs.miami.edu/life/summary?mode=SmallMolecule&amp;source=BROAD&amp;input=BRD-A38793261</a> | <a href="http://pubchem.ncbi.nlm.nih.gov/summary/summary.cgi?cid=46943339">http://pubchem.ncbi.nlm.nih.gov/summary/summary.cgi?cid=46943339</a> | None | HT29             | 10.<br>0u<br>m | 6.<br>0h      |
| 29 | 1.38<br>92 | SARMENTOGENIN                        | <a href="http://life.ccs.miami.edu/life/summary?mode=SmallMolecule&amp;source=BROAD&amp;input=BRD-A89434049">http://life.ccs.miami.edu/life/summary?mode=SmallMolecule&amp;source=BROAD&amp;input=BRD-A89434049</a> | <a href="http://pubchem.ncbi.nlm.nih.gov/summary/summary.cgi?cid=6708600">http://pubchem.ncbi.nlm.nih.gov/summary/summary.cgi?cid=6708600</a>   | None | VCAP             | 10.<br>0u<br>m | 6.<br>0h      |
| 30 | 1.38<br>87 | S1527                                | <a href="http://life.ccs.miami.edu/life/summary?mode=SmallMolecule&amp;source=BROAD&amp;input=BRD-K10916986">http://life.ccs.miami.edu/life/summary?mode=SmallMolecule&amp;source=BROAD&amp;input=BRD-K10916986</a> | <a href="http://pubchem.ncbi.nlm.nih.gov/summary/summary.cgi?cid=73707409">http://pubchem.ncbi.nlm.nih.gov/summary/summary.cgi?cid=73707409</a> | None | PHH              | 10.<br>0u<br>m | 24<br>.0<br>h |
| 31 | 1.38<br>82 | BRD-K68143200                        | <a href="http://life.ccs.miami.edu/life/summary?mode=SmallMolecule&amp;source=BROAD&amp;input=BRD-K68143200">http://life.ccs.miami.edu/life/summary?mode=SmallMolecule&amp;source=BROAD&amp;input=BRD-K68143200</a> | <a href="http://pubchem.ncbi.nlm.nih.gov/summary/summary.cgi?cid=262093">http://pubchem.ncbi.nlm.nih.gov/summary/summary.cgi?cid=262093</a>     | None | RMU<br>GS        | 10.<br>0u<br>m | 6.<br>0h      |
| 32 | 1.38<br>55 | BRD-A93393712                        | <a href="http://life.ccs.miami.edu/life/summary?mode=SmallMolecule&amp;source=BROAD&amp;input=BRD-A93393712">http://life.ccs.miami.edu/life/summary?mode=SmallMolecule&amp;source=BROAD&amp;input=BRD-A93393712</a> | <a href="http://pubchem.ncbi.nlm.nih.gov/summary/summary.cgi?cid=51003685">http://pubchem.ncbi.nlm.nih.gov/summary/summary.cgi?cid=51003685</a> | None | HT29             | 10.<br>0u<br>m | 6.<br>0h      |
| 33 | 1.38<br>35 | PKCbeta inhibitor                    | <a href="http://life.ccs.miami.edu/life/summary?mode=SmallMolecule&amp;source=BROAD&amp;input=BRD-K89687904">http://life.ccs.miami.edu/life/summary?mode=SmallMolecule&amp;source=BROAD&amp;input=BRD-K89687904</a> | <a href="http://pubchem.ncbi.nlm.nih.gov/summary/summary.cgi?cid=6419755">http://pubchem.ncbi.nlm.nih.gov/summary/summary.cgi?cid=6419755</a>   | None | VCAP             | 10.<br>0u<br>m | 24<br>.0<br>h |
| 34 | 1.38<br>22 | BRD-K75430629                        | <a href="http://life.ccs.miami.edu/life/summary?mode=SmallMolecule&amp;source=BROAD&amp;input=BRD-K75430629">http://life.ccs.miami.edu/life/summary?mode=SmallMolecule&amp;source=BROAD&amp;input=BRD-K75430629</a> | <a href="http://pubchem.ncbi.nlm.nih.gov/summary/summary.cgi?cid=9908783">http://pubchem.ncbi.nlm.nih.gov/summary/summary.cgi?cid=9908783</a>   | None | HT29             | 10.<br>0u<br>m | 6.<br>0h      |
| 35 | 1.38<br>12 | BRD-K94991378                        | <a href="http://life.ccs.miami.edu/life/summary?mode=SmallMolecule&amp;source=BROAD&amp;input=BRD-K94991378">http://life.ccs.miami.edu/life/summary?mode=SmallMolecule&amp;source=BROAD&amp;input=BRD-K94991378</a> | <a href="http://pubchem.ncbi.nlm.nih.gov/summary/summary.cgi?cid=6731789">http://pubchem.ncbi.nlm.nih.gov/summary/summary.cgi?cid=6731789</a>   | None | MCF7             | 10.<br>0u<br>m | 6.<br>0h      |
| 36 | 1.38<br>07 | BRD-K94991378                        | <a href="http://life.ccs.miami.edu/life/summary?mode=SmallMolecule&amp;source=BROAD&amp;input=BRD-K94991378">http://life.ccs.miami.edu/life/summary?mode=SmallMolecule&amp;source=BROAD&amp;input=BRD-K94991378</a> | <a href="http://pubchem.ncbi.nlm.nih.gov/summary/summary.cgi?cid=6731789">http://pubchem.ncbi.nlm.nih.gov/summary/summary.cgi?cid=6731789</a>   | None | HA1E             | 10.<br>0u<br>m | 6.<br>0h      |
| 37 | 1.38<br>03 | BRD-K26818574                        | <a href="http://life.ccs.miami.edu/life/summary?mode=SmallMolecule&amp;source=BROAD&amp;input=BRD-K26818574">http://life.ccs.miami.edu/life/summary?mode=SmallMolecule&amp;source=BROAD&amp;input=BRD-K26818574</a> | <a href="http://pubchem.ncbi.nlm.nih.gov/summary/summary.cgi?cid=25150857">http://pubchem.ncbi.nlm.nih.gov/summary/summary.cgi?cid=25150857</a> | None | HT29             | 10.<br>0u<br>m | 6.<br>0h      |
| 38 | 1.37<br>95 | BRD-K53932786                        | <a href="http://life.ccs.miami.edu/life/summary?mode=SmallMolecule&amp;source=BROAD&amp;input=BRD-K53932786">http://life.ccs.miami.edu/life/summary?mode=SmallMolecule&amp;source=BROAD&amp;input=BRD-K53932786</a> | <a href="http://pubchem.ncbi.nlm.nih.gov/summary/summary.cgi?cid=781660">http://pubchem.ncbi.nlm.nih.gov/summary/summary.cgi?cid=781660</a>     | None | MCF7             | 10.<br>0u<br>m | 6.<br>0h      |
| 39 | 1.37<br>8  | F3103-0039                           | <a href="http://life.ccs.miami.edu/life/summary?mode=SmallMolecule&amp;source=BROAD&amp;input=BRD-A93893742">http://life.ccs.miami.edu/life/summary?mode=SmallMolecule&amp;source=BROAD&amp;input=BRD-A93893742</a> | <a href="http://pubchem.ncbi.nlm.nih.gov/summary/summary.cgi?cid=2203170">http://pubchem.ncbi.nlm.nih.gov/summary/summary.cgi?cid=2203170</a>   | None | HEPG<br>2        | 10.<br>0u<br>m | 6.<br>0h      |
| 40 | 1.37<br>76 | BRD-K51318897                        | <a href="http://life.ccs.miami.edu/life/summary?mode=SmallMolecule&amp;source=BROAD&amp;input=BRD-K51318897">http://life.ccs.miami.edu/life/summary?mode=SmallMolecule&amp;source=BROAD&amp;input=BRD-K51318897</a> | <a href="http://pubchem.ncbi.nlm.nih.gov/summary/summary.cgi?cid=3334">http://pubchem.ncbi.nlm.nih.gov/summary/summary.cgi?cid=3334</a>         | None | HT29             | 10.<br>0u<br>m | 6.<br>0h      |
| 41 | 1.37<br>69 | CT-INCB                              | <a href="http://life.ccs.miami.edu/life/summary?mode=SmallMolecule&amp;source=BROAD&amp;input=BRD-K53972329">http://life.ccs.miami.edu/life/summary?mode=SmallMolecule&amp;source=BROAD&amp;input=BRD-K53972329</a> | <a href="http://pubchem.ncbi.nlm.nih.gov/summary/summary.cgi?cid=25126798">http://pubchem.ncbi.nlm.nih.gov/summary/summary.cgi?cid=25126798</a> | None | HEPG<br>2        | 10.<br>0u<br>m | 6.<br>0h      |



|    |            |                            |                                                                                                                                                                                                                     |                                                                                                                                                 |                                                                                         |            |                |               |
|----|------------|----------------------------|---------------------------------------------------------------------------------------------------------------------------------------------------------------------------------------------------------------------|-------------------------------------------------------------------------------------------------------------------------------------------------|-----------------------------------------------------------------------------------------|------------|----------------|---------------|
| 42 | 1.37<br>45 | H-5832                     | <a href="http://life.ccs.miami.edu/life/summary?mode=SmallMolecule&amp;source=BROAD&amp;input=BRD-A32161980">http://life.ccs.miami.edu/life/summary?mode=SmallMolecule&amp;source=BROAD&amp;input=BRD-A32161980</a> | <a href="http://pubchem.ncbi.nlm.nih.gov/summary/summary.cgi?cid=73707428">http://pubchem.ncbi.nlm.nih.gov/summary/summary.cgi?cid=73707428</a> | None                                                                                    | VCAP       | 10.<br>0u<br>m | 24<br>.0<br>h |
| 43 | 1.37<br>42 | CP 94253<br>hydrochloride  | <a href="http://life.ccs.miami.edu/life/summary?mode=SmallMolecule&amp;source=BROAD&amp;input=BRD-K33860217">http://life.ccs.miami.edu/life/summary?mode=SmallMolecule&amp;source=BROAD&amp;input=BRD-K33860217</a> | <a href="http://pubchem.ncbi.nlm.nih.gov/summary/summary.cgi?cid=4029677">http://pubchem.ncbi.nlm.nih.gov/summary/summary.cgi?cid=4029677</a>   | None                                                                                    | HCC5<br>15 | 10.<br>0u<br>m | 24<br>.0<br>h |
| 44 | 1.37<br>38 | Pravastatin sodium<br>salt | <a href="http://life.ccs.miami.edu/life/summary?mode=SmallMolecule&amp;source=BROAD&amp;input=BRD-K60511616">http://life.ccs.miami.edu/life/summary?mode=SmallMolecule&amp;source=BROAD&amp;input=BRD-K60511616</a> | <a href="http://pubchem.ncbi.nlm.nih.gov/summary/summary.cgi?cid=54687">http://pubchem.ncbi.nlm.nih.gov/summary/summary.cgi?cid=54687</a>       | <a href="http://www.drugbank.ca/drugs/DB00175">http://www.drugbank.ca/drugs/DB00175</a> | VCAP       | 10.<br>0u<br>m | 6.<br>0h      |
| 45 | 1.37<br>38 | BW-B 70C                   | <a href="http://life.ccs.miami.edu/life/summary?mode=SmallMolecule&amp;source=BROAD&amp;input=BRD-A68891053">http://life.ccs.miami.edu/life/summary?mode=SmallMolecule&amp;source=BROAD&amp;input=BRD-A68891053</a> | <a href="http://pubchem.ncbi.nlm.nih.gov/summary/summary.cgi?cid=5353454">http://pubchem.ncbi.nlm.nih.gov/summary/summary.cgi?cid=5353454</a>   | None                                                                                    | VCAP       | 10.<br>0u<br>m | 6.<br>0h      |
| 46 | 1.37<br>22 | BRD-A25775766              | <a href="http://life.ccs.miami.edu/life/summary?mode=SmallMolecule&amp;source=BROAD&amp;input=BRD-A25775766">http://life.ccs.miami.edu/life/summary?mode=SmallMolecule&amp;source=BROAD&amp;input=BRD-A25775766</a> | <a href="http://pubchem.ncbi.nlm.nih.gov/summary/summary.cgi?cid=6338099">http://pubchem.ncbi.nlm.nih.gov/summary/summary.cgi?cid=6338099</a>   | None                                                                                    | HT29       | 10.<br>0u<br>m | 6.<br>0h      |
| 47 | 1.37<br>2  | PX12                       | <a href="http://life.ccs.miami.edu/life/summary?mode=SmallMolecule&amp;source=BROAD&amp;input=BRD-A56592690">http://life.ccs.miami.edu/life/summary?mode=SmallMolecule&amp;source=BROAD&amp;input=BRD-A56592690</a> | <a href="http://pubchem.ncbi.nlm.nih.gov/summary/summary.cgi?cid=219104">http://pubchem.ncbi.nlm.nih.gov/summary/summary.cgi?cid=219104</a>     | None                                                                                    | RMGI       | 30.<br>0u<br>m | 6.<br>0h      |
| 48 | 1.37<br>15 | NCGC00188721-01            | <a href="http://life.ccs.miami.edu/life/summary?mode=SmallMolecule&amp;source=BROAD&amp;input=BRD-K02381115">http://life.ccs.miami.edu/life/summary?mode=SmallMolecule&amp;source=BROAD&amp;input=BRD-K02381115</a> | <a href="http://pubchem.ncbi.nlm.nih.gov/summary/summary.cgi?cid=50897779">http://pubchem.ncbi.nlm.nih.gov/summary/summary.cgi?cid=50897779</a> | None                                                                                    | HT29       | 10.<br>0u<br>m | 6.<br>0h      |
| 49 | 1.37<br>13 | BRD-K98173387              | <a href="http://life.ccs.miami.edu/life/summary?mode=SmallMolecule&amp;source=BROAD&amp;input=BRD-K98173387">http://life.ccs.miami.edu/life/summary?mode=SmallMolecule&amp;source=BROAD&amp;input=BRD-K98173387</a> | <a href="http://pubchem.ncbi.nlm.nih.gov/summary/summary.cgi?cid=44807133">http://pubchem.ncbi.nlm.nih.gov/summary/summary.cgi?cid=44807133</a> | None                                                                                    | VCAP       | 10.<br>0u<br>m | 24<br>.0<br>h |
| 50 | 1.37<br>12 | BRD-K77987382              | <a href="http://life.ccs.miami.edu/life/summary?mode=SmallMolecule&amp;source=BROAD&amp;input=BRD-K77987382">http://life.ccs.miami.edu/life/summary?mode=SmallMolecule&amp;source=BROAD&amp;input=BRD-K77987382</a> | <a href="http://pubchem.ncbi.nlm.nih.gov/summary/summary.cgi?cid=4030">http://pubchem.ncbi.nlm.nih.gov/summary/summary.cgi?cid=4030</a>         | <a href="http://www.drugbank.ca/drugs/DB00643">http://www.drugbank.ca/drugs/DB00643</a> | HEPG<br>2  | 10.<br>0u<br>m | 6.<br>0h      |
